# Supplementary material for: PLGA Nanoparticles Containing VCAM-1 Inhibitor Succinobucol and Chemotherapeutic Doxorubicin as Therapy against Primary Tumors and Their Lung Metastases
Source: MDPI journal article supplement (doi:10.3390/pharmaceutics15020349), 2023-01-20
Supplement: s1 [file s1]

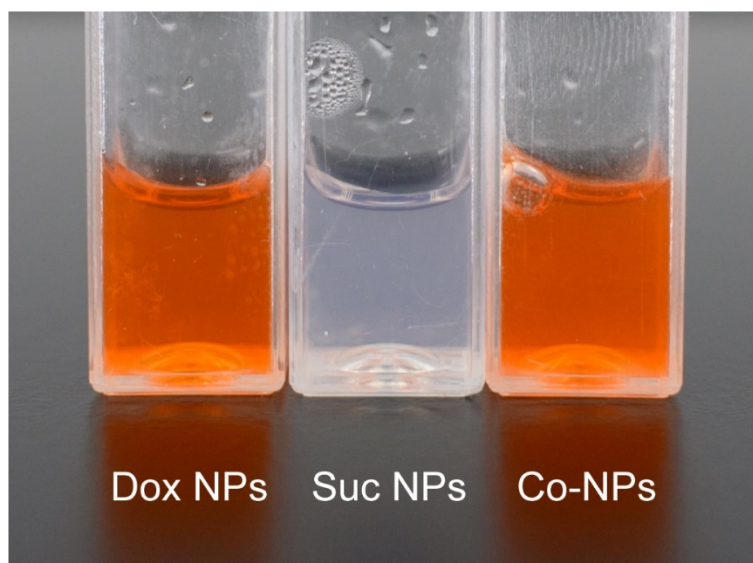

**Figure S1.** Photograph of prepared Dox NPs, Suc NPs, and Co-NPs.

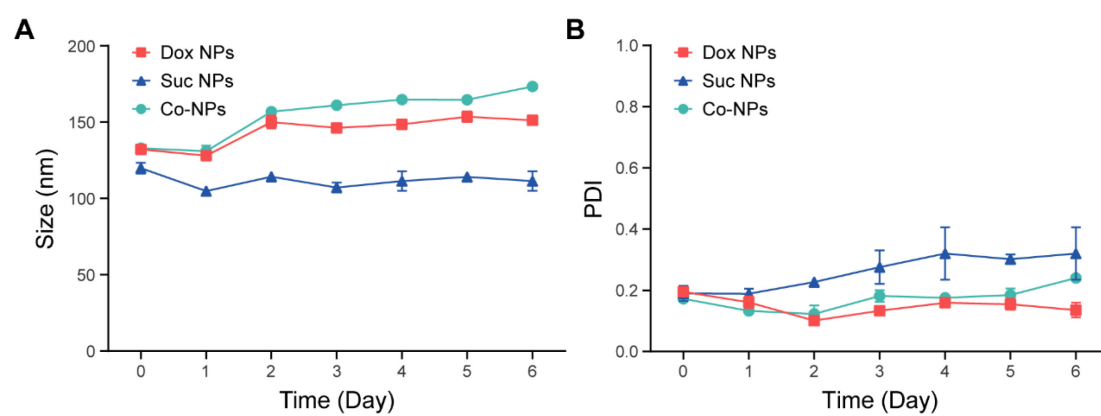

**Figure S2.** Storage stability of nanoparticles. **A.** Size of three kinds of NPs in PBS (pH 7.4) at 4 °C in 7 days. **B.** PDI of three kinds of NPs in PBS (pH 7.4) at 4 °C in 7 days.

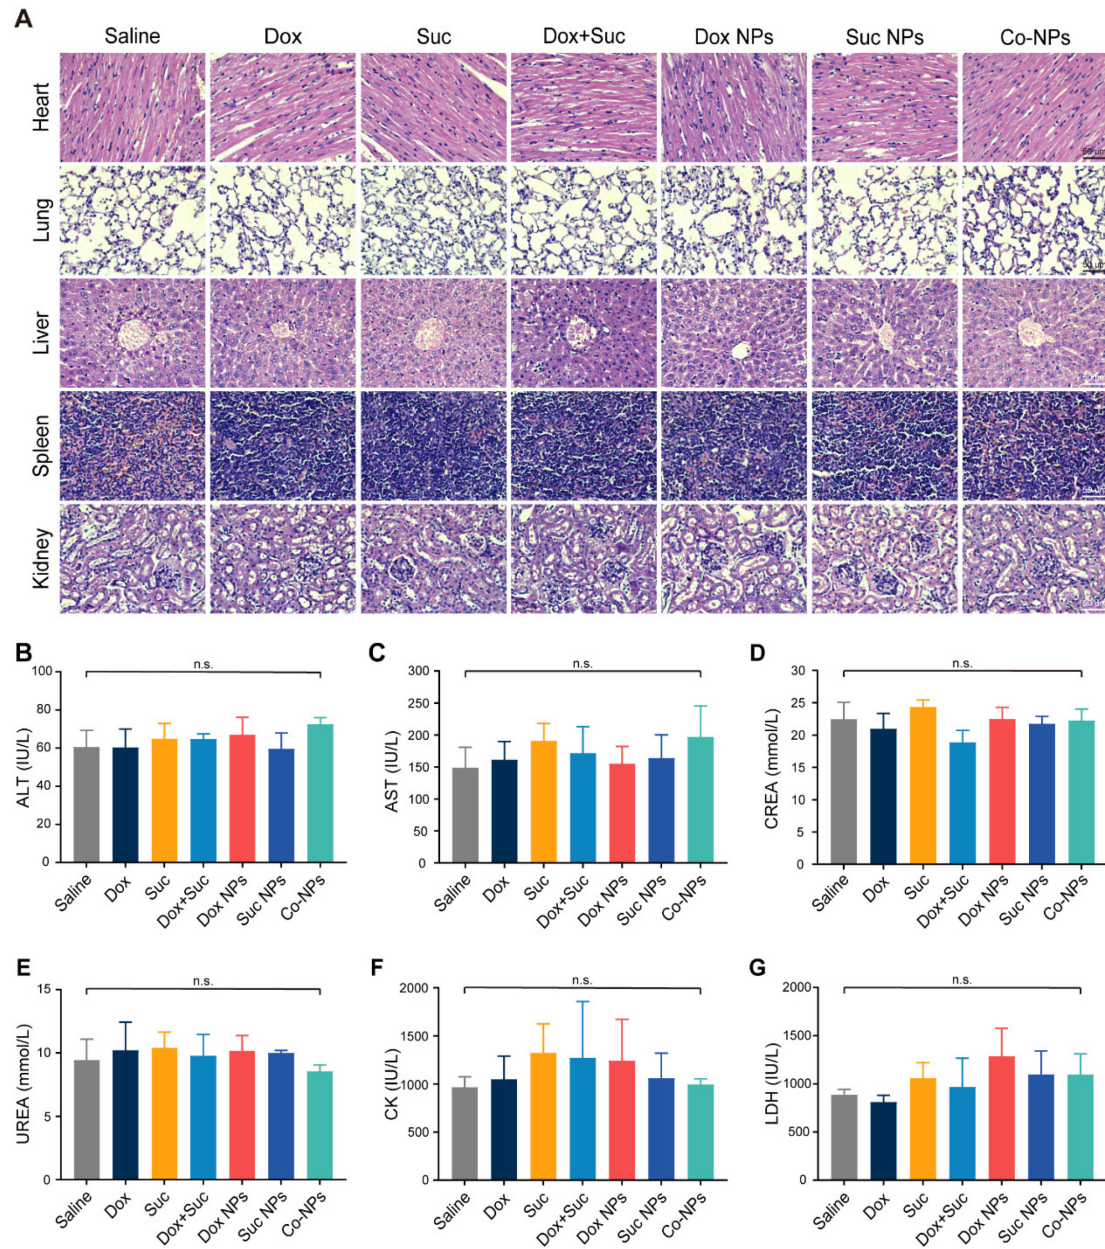

**Figure S3.** *In vivo* safety of nanoparticles. **A.** H&E staining of the harvested heart, lung, liver, spleen and kidney after different treatments. Scale bar = 50  $\mu$ m. **B-G.** Hematological analysis of ALT (**B**), AST (**C**), CREA (**D**), UREA (**E**), CK (**F**) and LDH (**G**) in C57BL/6 mice after different treatments. Each value represents the mean  $\pm$  SD (n = 3). (n.s., not significant)
